RESEARCH ARTICLE

# AICAR-Induced Activation of AMPK Inhibits TSH/SREBP-2/HMGCR Pathway in Liver

Shudong Liu<sup>1,5</sup>, Fei Jing<sup>1</sup>, Chunxiao Yu<sup>1</sup>, Ling Gao<sup>2,3\*</sup>, Yejun Qin<sup>4\*</sup>, Jiajun Zhao<sup>1,3\*</sup>

**1** Department of Endocrinology, Provincial Hospital Affiliated to Shandong University, Jinan, China, **2** Central Laboratory, Provincial Hospital Affiliated to Shandong University, Jinan, China, **3** Institute of Endocrinology, Shandong Academy of Clinical Medicine, Jinan, China, **4** Department of Pathology, Provincial Hospital Affiliated to Shandong University, Jinan, China, **5** Department of Endocrinology, Shandong Rongjun General Hospital, Jinan, China

☉ These authors contributed equally to the writing of this article.

\* [jjzhao@medmail.com.cn](mailto:jjzhao@medmail.com.cn) (JZ); [gaoling1@medmail.com.cn](mailto:gaoling1@medmail.com.cn) (LG); [qinyejun@163.com](mailto:qinyejun@163.com) (YQ)

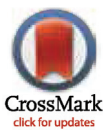

**OPEN ACCESS**

**Citation:** Liu S, Jing F, Yu C, Gao L, Qin Y, Zhao J (2015) AICAR-Induced Activation of AMPK Inhibits TSH/SREBP-2/HMGCR Pathway in Liver. PLoS ONE 10(5): e0124951. doi:10.1371/journal.pone.0124951

**Academic Editor:** Mengwei Zang, Boston University School of Medicine, UNITED STATES

**Received:** August 21, 2014

**Accepted:** March 19, 2015

**Published:** May 1, 2015

**Copyright:** © 2015 Liu et al. This is an open access article distributed under the terms of the [Creative Commons Attribution License](https://creativecommons.org/licenses/by/4.0/), which permits unrestricted use, distribution, and reproduction in any medium, provided the original author and source are credited.

**Data Availability Statement:** All relevant data are within the paper.

**Funding:** This work was supported by grants from the National Basic Research Program (2012CB524900), and the National Natural Science Foundation (81230018, 81430020, 81170794, 81270869, 81400828, 81471006). The funders had no role in study design, data collection and analysis, decision to publish, or preparation of the manuscript.

**Competing Interests:** The authors have declared that no competing interests exist.

## Abstract

Our previous study found that thyroid-stimulating hormone promoted sterol regulatory element-binding protein-2 (SREBP-2) expression and suppressed AMP-activated protein kinase (AMPK) activity in the liver, but it was unclear whether there was a direct link between TSH, AMPK and SREBP-2. Here, we demonstrate that the 5-aminoimidazole-4-carboxamide ribonucleoside (AICAR)-induced activation of AMPK directly inhibited the expression of SREBP-2 and its target genes HMGCR and HMGCS, which are key enzymes in cholesterol biosynthesis, and suppressed the TSH-stimulated up-regulation of SREBP-2 in HepG2 cells; similar results were obtained in TSH receptor knockout mice. Furthermore, AMPK, an evolutionally conserved serine/threonine kinase, phosphorylated threonine residues in the precursor and nuclear forms of SREBP-2, and TSH interacted with AMPK to influence SREBP-2 phosphorylation. These findings may represent a molecular mechanism by which AMPK ameliorates the hepatic steatosis and hypercholesterolemia associated with high TSH levels in patients with subclinical hypothyroidism (SCH).

## Introduction

Thyroid-stimulating hormone is secreted by the pituitary and regulates thyroid growth and differentiation. However, recent studies have discovered that TSH is a tropic hormone that has multiple effects on metabolism, including cholesterol synthesis and glucose metabolism [1, 2]. Several epidemiological studies have indicated positive correlations between TSH and total cholesterol, triglycerides, and low-density lipoprotein cholesterol (LDL-c) [3–6]. Subclinical hypothyroidism (SCH), which is characterized by normal thyroid hormone levels and elevated TSH levels, is often accompanied by hypercholesterolemia and associated with cardiovascular disease [7]. Therefore, more studies are focusing on the relationship between TSH and hypercholesterolemia to explore novel approaches for preventing cardiovascular disease.

The liver is the major organ involved in cholesterol metabolism. Sterol regulatory element-binding protein-2 (SREBP-2) is synthesized as a precursor protein in the endoplasmic reticulum and subsequently undergoes sequential proteolytic cleavage to attain the N-terminal transcriptionally active form; the active form translocates into the nucleus to promote the expression of target genes involved in cholesterol biosynthesis and uptake in the liver, such as 3-hydroxy-3-methylglutaryl-CoA synthase (HMGCS), 3-hydroxy-3-methylglutaryl-CoA reductase (HMGCR) and low-density lipoprotein receptor (LDLR) [8,9]. Liver-specific SREBP-2 transgenic mice exhibit a significant increase in the rate of cholesterol synthesis and elevated expression of HMGCS (13-fold), HMGCR (75-fold) and LDLR (5.8-fold) [10]. Our previous research demonstrated that TSH upregulates the expression of HMGCR, a rate-limiting enzyme in liver cholesterol synthesis, via the cAMP/PKA/CREB pathway [1]. Furthermore, Min HK et al. showed that the accumulation of triglycerides and free cholesterol in nonalcoholic fatty liver disease (NAFLD) was accompanied by the inhibition of AMPK activity and increased expression of SREBP-2 and HMGCR [11]. Recently, evidence has suggested that TSH levels are closely associated with NAFLD [12–14]. Therefore, these findings suggest a possible new role for TSH in hepatic steatosis and dyslipidemia. We found that TSH increases mRNA expression of SREBP-2 in liver cells (unpublished), but the precise molecular pathway remains unclear.

AMP-activated protein kinase (AMPK) is a crucial cellular energy sensor that is activated by phosphorylation at Thr<sup>172</sup> in the alpha subunit in response to various metabolic stressors, and AMPK is a major regulator of glucose and lipid metabolism that phosphorylates and inactivates numerous metabolic enzymes, including glycogen synthase, acetyl-CoA carboxylase (ACC), HMGCR, and CREB-regulated transcription coactivator 2 (CRTC2) [15]. Recently, AMPK has attracted more interest as a pharmacological target for therapeutic intervention in metabolic disorders [16–19]. Chronic activation of AMPK leads to a compensatory increase in SREBP-2 and HMGCR expression in the liver of a new transgenic mouse model with liver-specific expression of constitutively active (CA)-AMPK- $\alpha$ 1 [20], but in adipose tissue, SREBP-2 and HMGCR mRNA expression was down-regulated [21]. A recent study demonstrated that AMPK interacts with and phosphorylates SREBP-1 and SREBP-2, thereby inhibiting SREBP activation by impeding its proteolytic maturation and nuclear translocation [22].

However, it remains unclear whether there is a direct link between TSH, AMPK and SREBP-2. Therefore, we aimed to investigate whether AMPK plays an active role in regulating hepatic cholesterol metabolism by modulating SREBP-2 and whether AMPK affects the TSH-induced up-regulation of SREBP-2 in the liver; these data may provide a basis for the future clinical treatment of hypercholesterolemia associated with TSH.

## Materials and Methods

### Reagents and antibodies

5-Aminoimidazole-4-carboxamide ribonucleoside (AICAR) was from Toronto Research Chemicals (Downsview, ON, Canada). Adenosine 5'-monophosphate sodium salt (5' AMP), bTSH, three-1, 4-Dimercapto-2, 3-butanediol (DTT) and were purchased from Sigma (St. Louis, MO). RIPA lysis buffer and bicinchoninic acid (BCA) protein assay kits were from Shen-neng Bo Cai (Shanghai, China), p-Ser and p-Thr antibodies, immunoglobulin IgG, SREBP-2 antibody, and protein A/G plus agarose were obtained from Santa Cruz Biotechnology (Santa Cruz, CA). Mouse LMNB1 monoclonal antibody was from Proteintech (ProteinTech Group, Chicago, IL, USA). [ $\gamma$ -<sup>32</sup>P]ATP (specific activity 3000Ci/mmol) was from Perkin Elmer

(San Jose, CA, USA). 10×Assay buffer, Adenosine-5'-triphosphate (ATP), Acetylated-Lysine Antibody, DYKDDDDK Tag Antibody, phospho-Ser79 ACC1, anti- $\beta$ -actin antibody, Rabbit polyclonal AMPK antibody and phospho-AMPK (Thr-172) antibody were purchased from Cell Signaling Technology (Beverly, MA), and rabbit polyclonal AMPK antibodies recognize the subunit  $\alpha$ 1 or  $\alpha$ 2 isoform. SAMS peptide (HMRSAMSGHLHLVKRR) was purchased from Upstate Biotechnology (Lake Placid, NY). P81 phosphocellulose paper was from GE healthcare (Piscataway, NJ). Trizol and Lipofectamine 2000 were purchased from Invitrogen (Carlsbad, CA).

## Cell culture and treatments

The Human normal liver cell line L-02 and HepG2 human hepatoma cell line were obtained from the Type Culture Collection of the Chinese Academy of Sciences, Shanghai, China. HepG2 cells were cultured in Eagle's minimum essential medium (EMEM) (GIBCO) containing 10% fetal bovine serum (FBS), 100 units/ml penicillin, and 100  $\mu$ g/ml streptomycin, and the L-02 cells were cultured as previously described [1]. Cells were incubated in a humidified atmosphere of 5% CO<sub>2</sub> at 37°C. When the cells were 80% confluent and subjected to be treated after overnight serum depletion as previously described [2,23].

## Ethics statement

The use of animals in this study was in strict accordance with the relevant federal guidelines and institutional policies. The protocol was approved by the Animal Care and Use Committee of Shandong Provincial Hospital affiliated to Shandong University (approval number: NO. 2012–090). All surgical procedures were performed under sodium pentobarbital anesthesia, and all efforts were made to minimize suffering.

## Animal experiments

Wildtype TSH receptor mice (*Tshr*<sup>+/+</sup> mice) and TSH receptor knockout mice (*Tshr*<sup>-/-</sup> mice) have been previously described [2]. *Tshr*<sup>-/-</sup> mice were fed a diet containing 100 ppm thyroid powder (Sigma) from 21 days-old. When fed the supplemented diet for 3 and 5 weeks, 6-week-old and 8-week-old wild-type mice and the same age of *Tshr*<sup>-/-</sup> mice were collected blood to measure the level of serum TSH and total thyroxine4 (TT4), to eliminate the effect of abnormal thyroid hormone levels on metabolism, they exhibited equal levels of serum TSH and TT4. On the experimental day, 8-week-old *Tshr*<sup>+/+</sup> and *Tshr*<sup>-/-</sup> mice were divided into two groups (n = 5 per group) and were given an intraperitoneal injection of either phosphate-buffered saline (PBS) or AICAR [0.5 mg/g body wt-1] three times a week for 2 weeks (on Monday, Wednesday and Friday). PBS (control) was injected at the same volume and in the same manner as AICAR. After the treatment period, the animals were weighed and euthanized using pentobarbital sodium, and the livers were harvested and processed for subsequent analysis.

## RNA extraction and Real-Time PCR

Total RNA was extracted from cultured HepG2 cells or mouse livers using the Trizol method. First-strand cDNA was generated using a commercial PrimeScript RT reagent kit (TaKaRa, Otsu, Shiga, Japan). The resulting cDNA was amplified by real-time RT-PCR, using a SYBR Premix Ex Taq II (TaKaRa) and a LightCycler480 instrument (Roche Diagnostics). The mRNA levels of genes were normalized to that of  $\beta$ -actin and presented as relative to the

**Table 1. Quantitative RT-PCR primers.**

| Gene           | Species | Forward primer           | Reverse primer            |
|----------------|---------|--------------------------|---------------------------|
| HMGCR          | mouse   | ATCCAGGAGCGAACCAAGAG     | TACAGAAGCCCCAAGCACAA      |
| HMGCS          | mouse   | AAATGCCAGACCTACAGGTGG    | ATGCTGCATGTGTGTCCCA       |
| $\beta$ -actin | mouse   | ACCCAGCCATGTACGTAGC      | GTGTGGGTGACCCCGTCTC       |
| SREBP-2        | human   | CCCTTCAGTGCAACGGTCATTAC  | TGCCATTGGCCGTTTGTGTC      |
| HMGCR          | human   | CTTGTGTGTCCTTGGTATTAGAGC | ATCATCTTGACCCTCTGAGTTACAG |
| HMGCS          | human   | CATTAGACCGCTGCTATTCTGTC  | TTCAGCAACATCCGAGCTAGA     |
| $\beta$ -actin | human   | ACAGAGCCTCGCCTTTGCCG     | ACATGCCGGAGCCGTTGTGCG     |

doi:10.1371/journal.pone.0124951.t001

control. The relative quantification of gene expression was analyzed by the  $2^{-\Delta\Delta Ct}$  method [24]. The PCR primers were designed and listed in [Table 1](#).

### Protein extraction and Western blotting

Nuclear and cytoplasmic extracts were prepared using the NE-PER nuclear and cytoplasmic extraction reagent kit (Pierce Biotechnology Inc.) according to the manufacturer's instructions. Total protein extract and Western blotting (WB) analysis were conducted as described previously [2].

### Immunoprecipitation

The immunoprecipitation of the specific proteins from HepG2 cells was carried out as previously described [25].

### AMPK activity assay

AMPK activity was measured using the SAMS peptide assay. Total protein (500  $\mu$ g) was immunoprecipitated with polyclonal rabbit AMPK $\alpha$  antibodies as previously described [23].

### Plasmid and transfection

The expression vector pcDNA3.1-2 $\times$ FLAG SREBP-2 (human, amino acids 1–481) was obtained from Addgene (Plasmid 26807, provided by Timothy Osborne, La Jolla, CA) [26]. For transient expression assays, HepG2 cells were cultured in complete medium with 10% FBS to ~80% cell confluence, synchronized overnight in serum-free EMEM in 6cm dishes and then transfected with the plasmids using Lipofectamine 2000 according to the manufacturer's protocols.

### Immunofluorescence staining

SREBP-2 immunofluorescent staining in HepG2 cells was performed to determine the subcellular localization of SREBP-2. HepG2 cells seeded onto cover slides were treated without or with AICAR (0.5 mM) for 12 or 24 h. Immunofluorescence was then performed. Cover slides were incubated overnight at 4°C with an SREBP-2 antibody and subsequently with a secondary antibody (conjugated to TRITC); the nuclei were stained with 4'6-diamidino-2-phenylindole (DAPI). Fluorescence was visualized on Karl Zeiss A2 microscopes.

## Double Immunofluorescence Staining for SREBP-2 and phospho-Thr antibody in HepG2 cells

Because specific antibodies to detect threonine-phosphorylated SREBP-2 were not available, we used double immunofluorescence staining with SREBP-2 and phospho-Thr antibody. Staining was carried out as described [27].

## Statistical analysis

Mean  $\pm$  SEM values were analyzed using GraphPad Prism (version 5; GraphPad Software Inc, San Diego, CA). All of the experiments were repeated at least three independent times. We assessed the differences between means by one-way analysis of variance followed by Tukey's multiple comparison tests. Differences were considered significant at  $p < 0.05$ .

## Results

### TSH increased the expression of SREBP-2, HMGCR and HMGCS in HepG2 cells.

SREBP-2 preferentially regulates genes that are responsible for cholesterol synthesis and uptake in the liver. The protein levels of the SREBP-2 precursor and the nuclear active form increased in a time-dependent manner in HepG2 cells after treatment with TSH (4  $\mu$ M) (Fig 1A–1C). Because we previously determined that TSH did not significantly affect LDLR expression [1], we focused on the two rate-controlling enzymes, HMGCR and HMGCS. As expected, TSH treatment up-regulated HMGCS mRNA expression at 48 h and HMGCR mRNA expression at both 24 and 48 h ( $p < 0.05$ ) (Fig 1D).

### AMPK activation by AICAR directly inhibited SREBP-2 expression in HepG2 cells.

SREBP-2 is regulated in multiple ways, including sterol feedback mechanisms and modulation of mRNA expression. SREBP-2 is a direct target of AMPK, which inhibits SREBP-2 transcriptional activity [22]. To explore whether AMPK activation regulates the expression of the SREBP-2 precursor and nuclear active forms, we treated HepG2 cells with AICAR (an AMPK activator) for 12 or 24 h. Phospho-AMPK (p-AMPK) and phospho-ACC (p-ACC), indicators of AMPK activation [17], were markedly up-regulated in a time-dependent manner (Fig 2A). The SREBP-2 precursor levels slightly decreased in response to AICAR at 12 h and were significantly decreased by 24 h (Fig 2B). However, the nuclear active form of SREBP-2 exhibited a significant decrease during the AICAR treatment period (Fig 2C).

To confirm the data above, SREBP-2 mRNA expression was determined by real-time PCR. AICAR-mediated AMPK activation decreased SREBP-2 mRNA expression in a time-dependent manner (Fig 2D). Similar results are shown in Fig 2E, which illustrates that the immunofluorescent staining intensity of nuclear SREBP-2 was obviously reduced by AICAR. These data indicated that AMPK activation directly inhibited SREBP-2 expression and activity.

### AMPK activation reduced SREBP-2 protein levels and target gene expression in the livers of AICAR-treated *Tshr*<sup>-/-</sup> and *Tshr*<sup>+/+</sup> mice.

It has been previously reported that TSH suppresses AMPK activity in the thyroid gland and the liver [2, 28]. To further investigate the effects of TSH and AMPK on SREBP-2, we

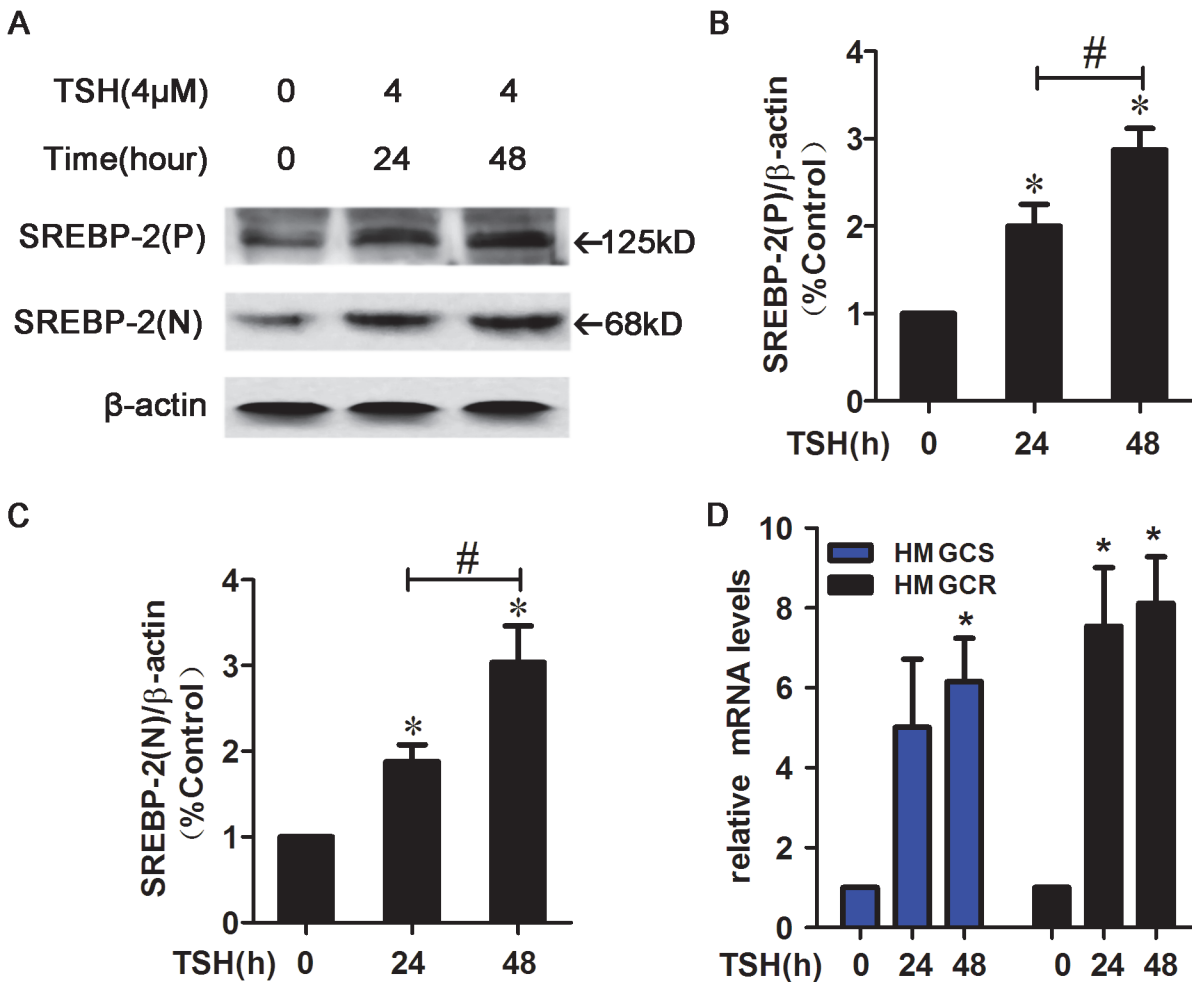

**Fig 1. TSH increased SREBP-2 protein levels and the expression of its target genes, HMGCR and HMGCS, in HepG2 cells.** (A) HepG2 cells were pretreated with TSH (4 μM) for 24 or 48 h. Whole cell lysates were subjected to Western blotting (WB) using an SREBP-2 antibody that recognizes both the SREBP-2 precursor and nuclear active forms. (P) and (N) denote the precursor and nuclear active forms of SREBP-2, respectively. (B-C) Densitometric quantifications of SREBP-2 (P) and SREBP-2 (N) are shown. Densitometry was performed using ImageJ (version 1.45) and normalized to β-actin. The data are presented as the mean ± SEM. \**p* < 0.05 versus zero concentration of TSH, #*p* < 0.05 versus TSH (24h). (D) HepG2 cells were treated with TSH (4 μM) for 24 or 48 h and then were harvested to monitor the mRNA expression of HMGCR and HMGCS. β-actin was used for normalization, and the control was set to 1 in the Real-Time PCR data. All the experiments were performed in duplicate. \**p* < 0.05 versus zero concentration of TSH.

doi:10.1371/journal.pone.0124951.g001

established *Tshr*<sup>+/+</sup> and *Tshr*<sup>-/-</sup> mouse models. As shown in Fig 3A, the SREBP-2 precursor and nuclear active forms were decreased in the livers of *Tshr*<sup>-/-</sup> mice compared with *Tshr*<sup>+/+</sup> mice, although the exact mechanisms by which this occurs remain unclear. The mRNA expression of HMGCR was also significantly reduced, and HMGCS mRNA expression exhibited a decreasing trend (Fig 3B).

AMPK activity increased in the livers of PBS-treated *Tshr*<sup>-/-</sup> mice compared with *Tshr*<sup>+/+</sup> mice. Furthermore, the SREBP-2 precursor and nuclear active forms were significantly down-regulated in *Tshr*<sup>-/-</sup> mice. AICAR treatment enhanced AMPK activity and reduced SREBP-2 protein levels in the livers of both *Tshr*<sup>-/-</sup> and *Tshr*<sup>+/+</sup> mice (Fig 3C–3E). AICAR significantly decreased HMGCR mRNA expression (Fig 3F). These results indicated that AMPK activation ameliorated the SREBP-2 up-regulation induced by TSH.

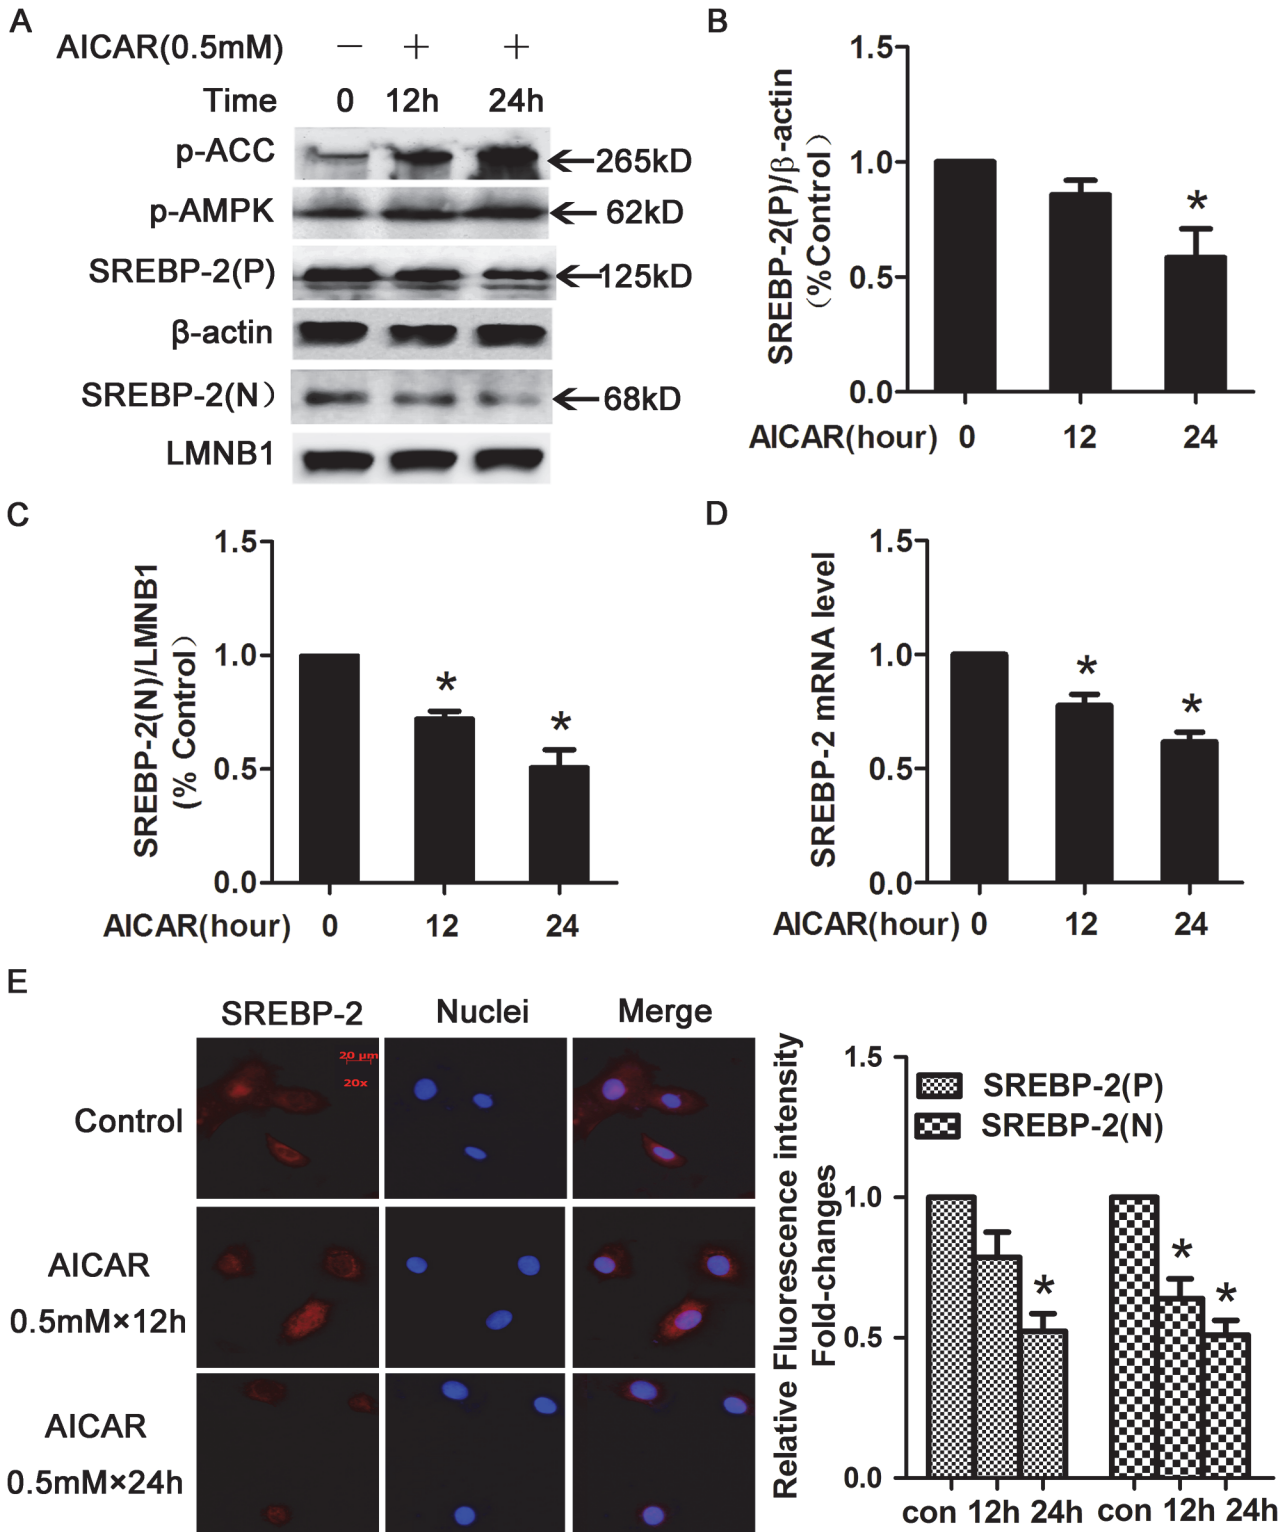

**Fig 2. AICAR-activated AMPK decreased SREBP-2 protein levels.** (A) HepG2 cells were treated with or without 0.5 mmol/l (0.5 mM) AICAR for 12 or 24 h and were subsequently washed with phosphate-buffered saline (PBS) and lysed. Nuclear and cytoplasmic extracts were analyzed by WB. β-actin was used as a cytoplasmic marker, and LaminB1 (LMNB1) was used as the nuclear marker. (B-C) Densitometric quantification of SREBP-2 (P) and SREBP-2 (N). The data are presented as the mean ± SEM. \**p* < 0.05 versus control (con, without AICAR). (D) AICAR-activated AMPK inhibited the expression of SREBP-2 in HepG2 cells. HepG2 cells were treated with or without 0.5 mM AICAR for 12 or 24 h and then were harvested to determine the mRNA

expression of SREBP-2.  $\beta$ -actin was used for normalization, and the control was set to 1 in the Real-Time PCR data. All the experiments were performed in duplicate.  $*p < 0.05$  versus control. (E) Immunofluorescence images of SREBP-2 (red) and nuclear staining with 4', 6-diamidino-2-phenylindole (DAPI, blue) in HepG2 cells. Magnification,  $\times 200$ . Semiquantification analysis by ImageJ software of fluorescence intensity of SREBP-2 precursor and nuclear form in HepG2 cells. Bar-graph represents the results from 3 separate experiments and the fluorescence intensity of SREBP-2 from HepG2 cells without AICAR treatment was set as 1.

doi:10.1371/journal.pone.0124951.g002

### AICAR stimulated AMPK activity and suppressed the TSH-induced up-regulation of SREBP-2 in HepG2 cells.

To further confirm the effects of TSH on AMPK activity, we performed a SAMS peptide phosphorylation assay. In HepG2 cells, AMPK activity was markedly decreased by TSH compared with control and increased by AICAR treatment (Fig 4A). We next examined whether the TSH-induced up-regulation of SREBP-2 occurred via AMPK activation. As shown in Fig 4B–4D, the TSH-induced up-regulation of the SREBP-2 precursor and nuclear active forms was ameliorated by AICAR (Fig 4B–4D).

To determine the functional consequences of the AMPK-mediated suppression of SREBP-2, the gene expression of SREBP-2 target genes was assessed by RT-PCR. Consistent with the suppressed SREBP-2 protein levels, the TSH-mediated up-regulation of HMGCR and HMGCS mRNA expression was attenuated by AICAR in HepG2 cells (Fig 4E). These data indicated that AICAR activated AMPK and suppressed the TSH-induced up-regulation of SREBP-2 as well as SREBP-2 target gene transcription.

### Threonine phosphorylation of SREBP-2 was observed in AICAR-treated cells with activated AMPK and in mouse livers.

AMPK, an evolutionally conserved serine/threonine kinase, plays an important role in regulating key metabolic processes by phosphorylating multiple enzymes involved in fatty acid oxidation and cholesterol synthesis, leading to their activation or inhibition. A recent study demonstrated that SREBP-2 is a direct target of AMPK in HEK293T cells and in the *LDLR*<sup>-/-</sup> mouse liver [22]. To further investigate whether AMPK is involved in the phosphorylation of SREBP-2, we detected phosphorylation at threonine (p-Thr) and serine (p-Ser) residues with specific antibodies. Immunoprecipitation of total protein with SREBP-2 antibodies and immunoblot analysis with p-Ser or p-Thr antibodies demonstrated that the SREBP-2 precursor and nuclear forms were phosphorylated on threonine residues, not on serine residues, in HepG2 cells (Fig 5A and 5B). AMPK activity was higher in the livers of *Tshr*<sup>-/-</sup> mice than in *Tshr*<sup>+/+</sup> mice, and consistent with the above observations, the level of threonine phosphorylation of the endogenous SREBP-2 precursor was higher in *Tshr*<sup>-/-</sup> mice than in *Tshr*<sup>+/+</sup> mice (Fig 5C). Similar results are obtained using liver L02 cells (Fig 5D). These results demonstrated a direct interaction between AMPK and SREBP-2 that involved protein phosphorylation.

### TSH repressed the AICAR-mediated phosphorylation of SREBP-2.

As mentioned above, TSH suppresses AMPK activity in the liver; therefore, we hypothesized that TSH could influence the AMPK-induced phosphorylation of SREBP-2. Because specific phosphorylated SREBP-2 antibodies were not available, we utilized double immunofluorescence staining to test this hypothesis. As shown in Fig 6, phosphorylated threonine was visualized as red, and SREBP-2 was visualized as green. The colocalization of phosphorylated threonine and SREBP-2 (phosphorylated-SREBP-2) produced a yellow signal. AICAR



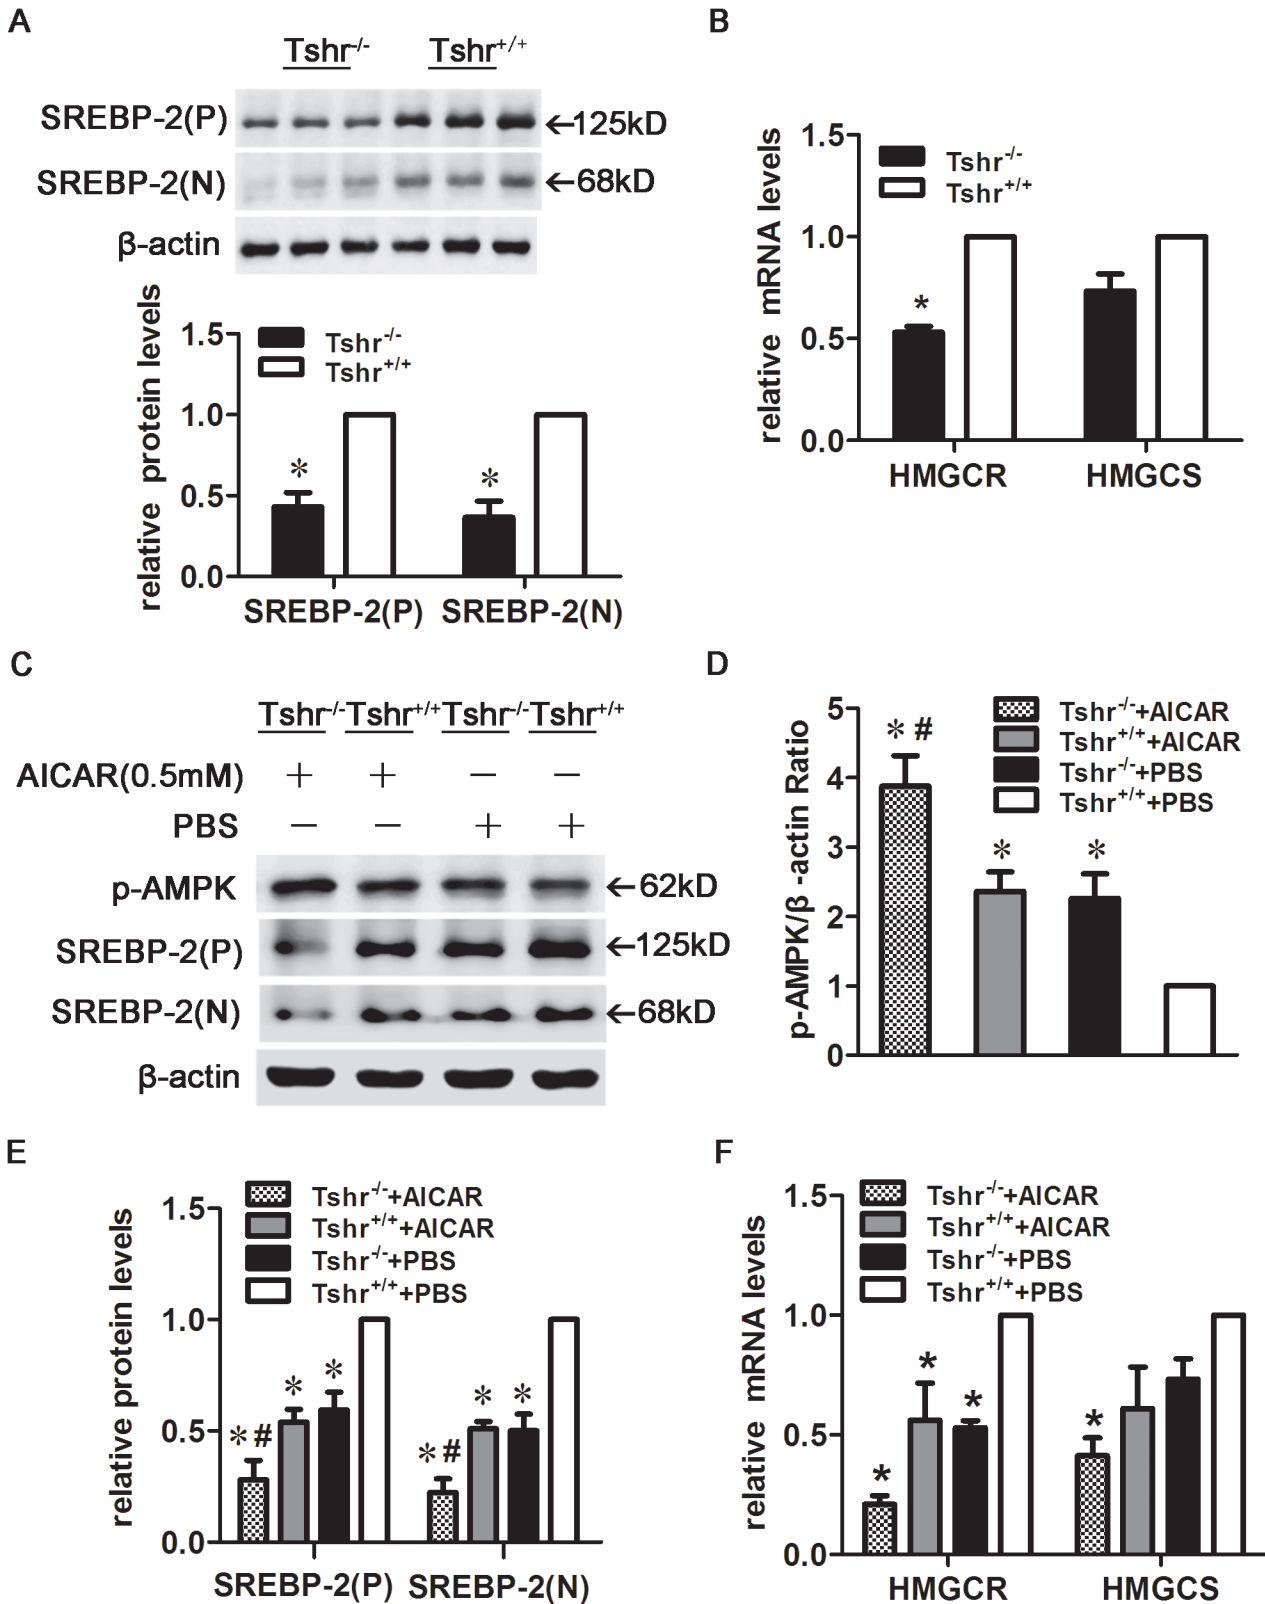

**Fig 3. AMPK activation reduced SREBP-2 protein and target gene expression in the livers of AICAR-treated *Tshr*<sup>-/-</sup> and *Tshr*<sup>+/+</sup> mice.** (A) SREBP-2 protein levels were decreased in *Tshr*<sup>-/-</sup> mice (n = 3 animals/group). Densitometric quantifications of SREBP-2 (P) and SREBP-2 (N) are shown. (B) HMGCR and HMGCS expression in the livers of *Tshr*<sup>-/-</sup> and *Tshr*<sup>+/+</sup> mice. \*p < 0.05 versus *Tshr*<sup>+/+</sup> mice. (C) AMPK activation decreased the expression of the

SREBP-2 precursor and nuclear forms in the livers of AICAR-treated *Tshr*<sup>-/-</sup> and *Tshr*<sup>+/+</sup> mice. *Tshr*<sup>-/-</sup> and *Tshr*<sup>+/+</sup> mice were injected intraperitoneally three times a week for 2 weeks with AICAR or PBS, and liver extracts were subjected to WB with antibodies against p-AMPK and SREBP-2. The WBs are representative of the 5 animals per group. (D-E) Densitometric quantifications of p-AMPK, SREBP-2 (P) and SREBP-2 (N). The data are presented as the mean  $\pm$  SEM. \* $p < 0.05$  versus PBS-treated *Tshr*<sup>+/+</sup> mice, # $p < 0.05$  versus PBS-treated *Tshr*<sup>-/-</sup> mice. (F) HMGCR and HMGCS expression in the livers of AICAR-treated *Tshr*<sup>-/-</sup> and *Tshr*<sup>+/+</sup> mice. The data are presented as the mean  $\pm$  SEM. \* $p < 0.05$  versus PBS-treated *Tshr*<sup>+/+</sup> mice.

doi:10.1371/journal.pone.0124951.g003

treatment significantly increased the levels of phosphorylated SREBP-2 (yellow), but this effect was inhibited by TSH.

## Discussion

The present study demonstrated that AICAR activated AMPK, which directly phosphorylated SREBP-2 at threonine residues and suppressed its up-regulation by TSH, thereby leading to decreased transcription of SREBP-2 and its target genes (Fig 7). These data may represent a molecular mechanism by which AMPK activation ameliorates hepatic steatosis and hypercholesterolemia associated with high TSH levels in SCH patients.

It has long been known that thyroid hormones play an important role in lipid metabolism, dyslipidemia is a common finding in patients with clinical hypothyroidism, including mainly elevated levels of total and LDL cholesterol, the underlying mechanism is widely thought to be thyroid hormones deficiency [7]. Subclinical hypothyroidism (SCH), which is characterized by normal thyroid hormone levels and elevated TSH levels [7], is a considerably more common metabolic disorder than clinical hypothyroidism. Patients with SCH are usually asymptomatic, but because of its association with dyslipidemia, these patients typically present with increased total and LDL cholesterol; therefore, SCH is as an independent risk factor for atherosclerosis as well as obesity, hypertension, and diabetes [3, 29, 30]. But it is hard to explain hypercholesterolemia in SCH only by the role of thyroid hormone, recent studies have focused on the relationship between TSH and lipids, aiming to elucidate the details of this association [1, 3, 4, 6] and suggesting that inhibiting TSH may be important for preventing dyslipidemia and hepatic steatosis.

Our previous studies demonstrated that TSH up-regulates hepatic HMGCR and SREBP-2 expression (unpublished) in the liver [1]. SREBP-2 is a key transcription factor that regulates HMGCR and HMGCS expression. In the present study, the SREBP-2 precursor and nuclear active forms as well as the HMGCR and HMGCS target genes were significantly up-regulated by TSH in HepG2 cells, which was consistent with our previous findings. Interestingly, this up-regulation was suppressed by AMPK after activation with AICAR. We confirmed this observation in vivo using knockout mice. *Tshr*<sup>-/-</sup> mice exhibited increased AMPK activity and decreased expression of HMGCR, HMGCS, and the SREBP-2 precursor and nuclear active forms in the liver compared with *Tshr*<sup>+/+</sup> mice.

AMPK is a crucial cellular and whole-body energy sensor that phosphorylates and regulates numerous proteins involved in nutrient metabolism and thereby has a pleiotropic beneficial effect in different tissues. Recently, AMPK has attracted considerable interest as a therapeutic target to treat the metabolic dysfunction observed in Metabolic Syndrome and diabetes [18]. AMPK decreases lipogenesis in the liver, mainly by phosphorylating and inactivating ACC1 and HMGCR, thereby inhibiting de novo fatty acid and cholesterol synthesis. Li and colleagues demonstrated that AMPK interacts with and phosphorylates SREBP-1c and SREBP-2, inhibiting the SREBP activation steps of proteolytic maturation and nuclear translocation [22]. In our study, after activation by AICAR, AMPK directly phosphorylated threonine residues in SREBP-2, and the SREBP-2 precursor and the nuclear active form of SREBP-2 in particular

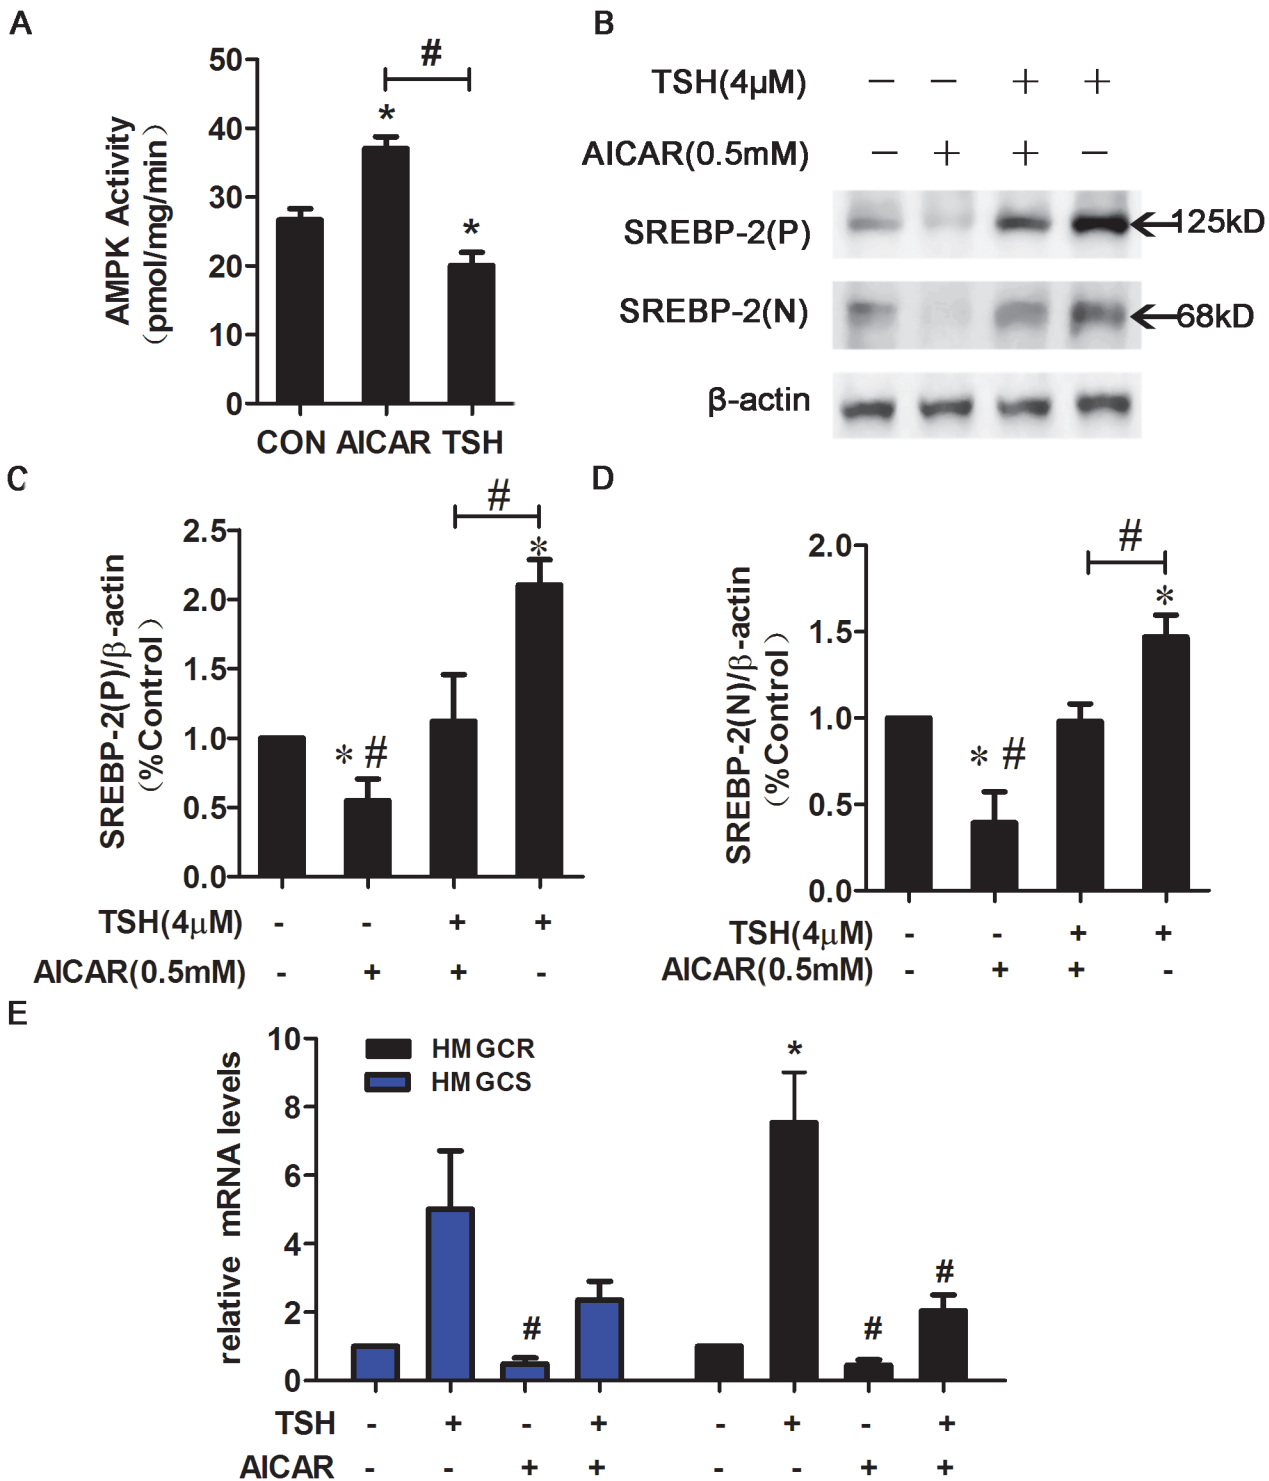

**Fig 4. AMPK activation by AICAR attenuated the TSH-mediated increase in SREBP-2.** (A) TSH decreased AMPK activity. HepG2 cells were synchronized overnight in serum-free EMEM and then treated with AICAR (0.5 mM) or TSH (4 μmol/L) for 24 h. AMPK activity was measured using the SAMS peptide phosphorylation assay and was calculated as picomoles per minute per milligram protein. The data are presented as the mean ± SEM (n = 4). \**p* < 0.05 compared with control (con). #*p* < 0.05 versus TSH. (B) HepG2 cells were pretreated with TSH (4 μM) for 24 h in the absence or presence of AICAR (0.5 mM) for 24 h. Whole cell lysates were subjected to WB using the SREBP-2 antibody. (C-D) Densitometric quantification of SREBP-2 (P) and SREBP-2 (N). The data are presented as the mean ± SEM. \**p* < 0.05 versus untreated cells; #*p* < 0.05 versus TSH-treated cells. (E) AICAR activated AMPK, which down-regulated the mRNA expression of HMGCR and HMGCS in TSH-treated HepG2 cells. These experiments were repeated at least three times with similar results.

doi:10.1371/journal.pone.0124951.g004

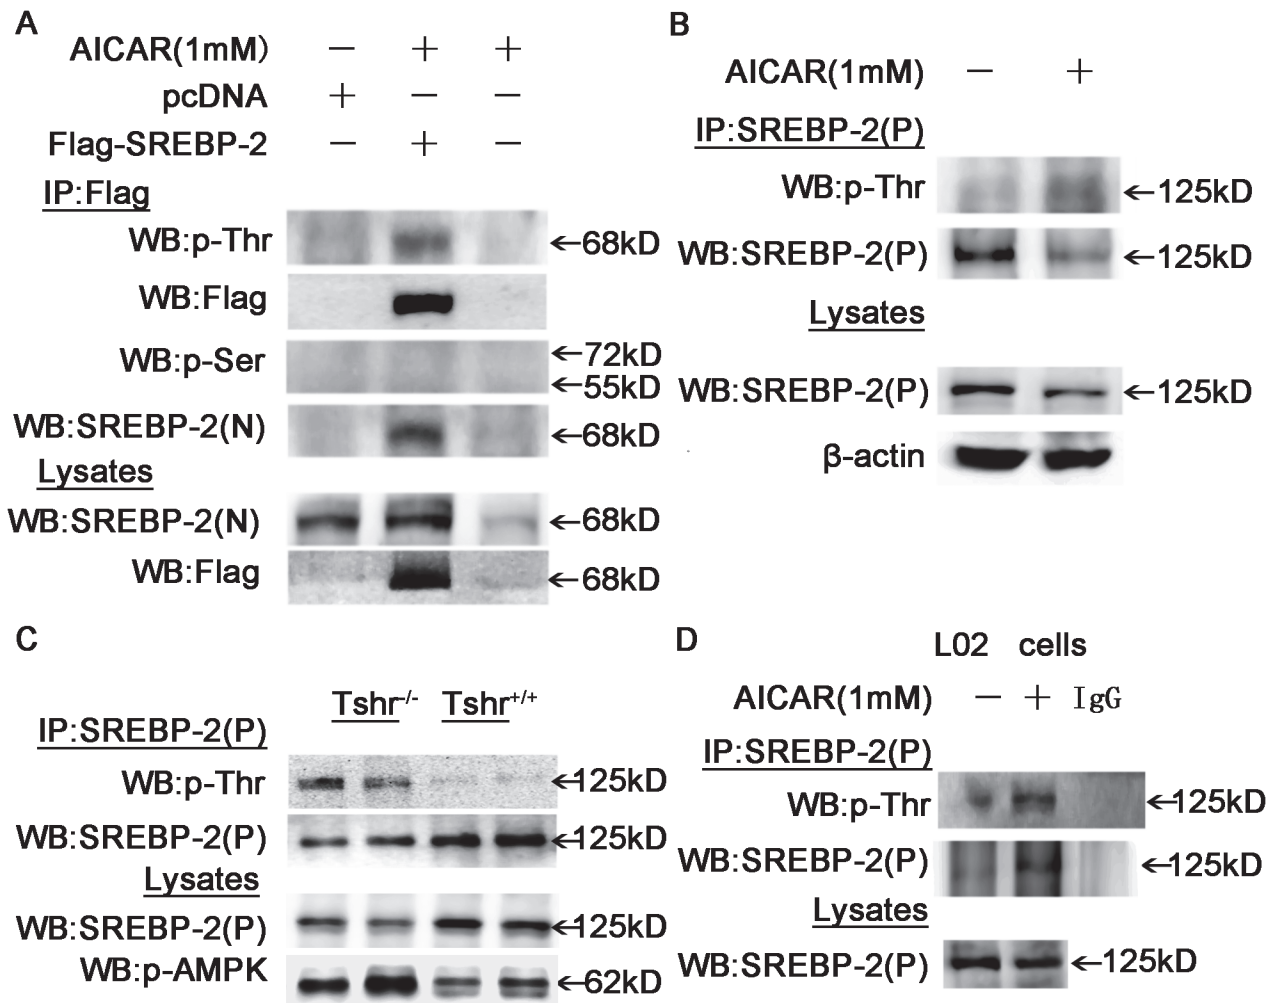

**Fig 5. AMPK activation by AICAR induced the threonine phosphorylation of the precursor and nuclear forms of SREBP-2.** (A) HepG2 cells were transfected with pc-DNA3.1 encoding 2×flag-tagged human nuclear SREBP-2 or pcDNA empty vector or vehicle for 48 h and then were treated with or without AICAR (1 mM) for 24 h. Cell lysates were purified by immunoprecipitation (IP) with an anti-Flag antibody and were subjected to WB with antibodies against phosphorylated-Threonine (p-Thr) or phosphorylated-Serine (p-Ser). Total lysates were analyzed by WB with anti-flag and SREBP-2 antibodies as indicated. (B) HepG2 cells were treated with AICAR (1 mM) for 24 h, and the cell lysates were immunoprecipitated with an SREBP-2 antibody and subjected to WB with antibodies against p-Thr and p-Ser (data not shown). SREBP-2(P) denotes the antibody that only recognizes the SREBP-2 precursor. (C) Total protein (500 μg) from *Tshr<sup>+/+</sup>* and *Tshr<sup>-/-</sup>* mouse liver extracts were purified by IP with the SREBP-2 precursor antibody and subjected to WB with the p-Thr antibody. Total lysates were analyzed by WB with antibodies against p-AMPK and SREBP-2 as indicated. (D) Lysates from L02 cells treated with AICAR for 24 h were subjected to IP with an SREBP-2 antibody and then analyzed by WB with an antibody against p-Thr.

doi:10.1371/journal.pone.0124951.g005

were significantly down-regulated in a time-dependent manner; these results are consistent with the data published by Li and others [31, 32]. The down-regulation of SREBP-2 was accompanied by a significant decrease in HMGCR mRNA expression and a slight decrease in HMGCS mRNA expression; this disparity may derive from the differential effects of SREBP-2 in stimulating target gene transcription. Our results indicate that AMPK activation by AICAR could suppress up-regulation of SREBP-2 induced by TSH; on the other hand, AMPK activation by AICAR alone also reduced SREBP-2 protein levels in HepG2 cells and both *Tshr<sup>+/+</sup>* and *Tshr<sup>-/-</sup>* mice, indicating that the effect of AMPK on the SREBP-2 pathway is independent of TSH stimulation (Fig 7).

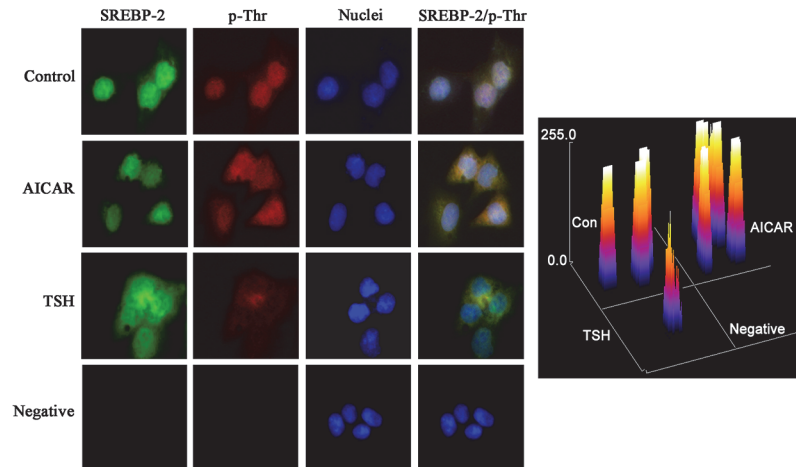

**Fig 6. Double immunofluorescence staining for phosphorylated SREBP-2 in HepG2 cells.** HepG2 cells were treated with AICAR (1 mmol/L) for 12 h or TSH (4  $\mu$ M) for 24 h. The yellow in the images is derived from dual staining with the red p-Thr antibody and the green anti-SREBP-2 antibody. The nuclei were detected with 4', 6-diamidino-2-phenylindole (DAPI). Original magnification, The intensity of staining obtained with SREBP-2/p-Thr was measured by ImageJ.

doi:10.1371/journal.pone.0124951.g006

We and other researchers have reported that TSH suppresses AMPK phosphorylation/activation in the thyroid gland and liver [2, 28]. Although the precise mechanism for the inhibition of AMPK by TSH has not yet been fully elucidated, we determined that TSH interacted with AMPK to influence the phosphorylation of SREBP-2, but the biological implications of SREBP-2 phosphorylation are complex. It has been demonstrated that the nuclear form of SREBP-2 is modified by phosphorylation [25, 33], acetylation [34], sumoylation [35], and ubiquitination [36], and these modifications interact and regulate SREBP-2 stability and/or transcriptional activity. Ser432/Ser436 can be phosphorylated in nuclear SREBP-2, which enhances its ubiquitination and proteasome-mediated degradation through a phosphorylation-dependent mechanism [36]. We speculate that the phosphorylation of SREBP-2 at threonine residues may significantly enhance its degradation, consequently leading to the reduced expression of SREBP-2-regulated genes. Future studies are necessary to identify the specific phosphorylation site to fully understand the mechanisms of SREBP-2 regulation.

In conclusion, the current study demonstrated that after activation by AICAR, AMPK directly phosphorylated SREBP-2 at threonine residues and suppressed its up-regulation by TSH. The pharmacological stimulation of AMPK may have considerable potential for reversing the dyslipidemia associated with high TSH levels in SCH patients.

## Acknowledgments

This work was supported by grants from the National Basic Research Program (2012CB524900), the National Natural Science Foundation (81230018, 81430020, 81170794, 81270869, 81400828, 81471006). We would like to thank Liang Ting at Institute of Experimental Nuclear Medicine of Shandong University for helping to perform SAMS assay. We also thank Wang Qi, Dr Li Yujie, Dr Xu Chao and Dr. Ma Shizhan for their valuable comments and their constructive suggestions.

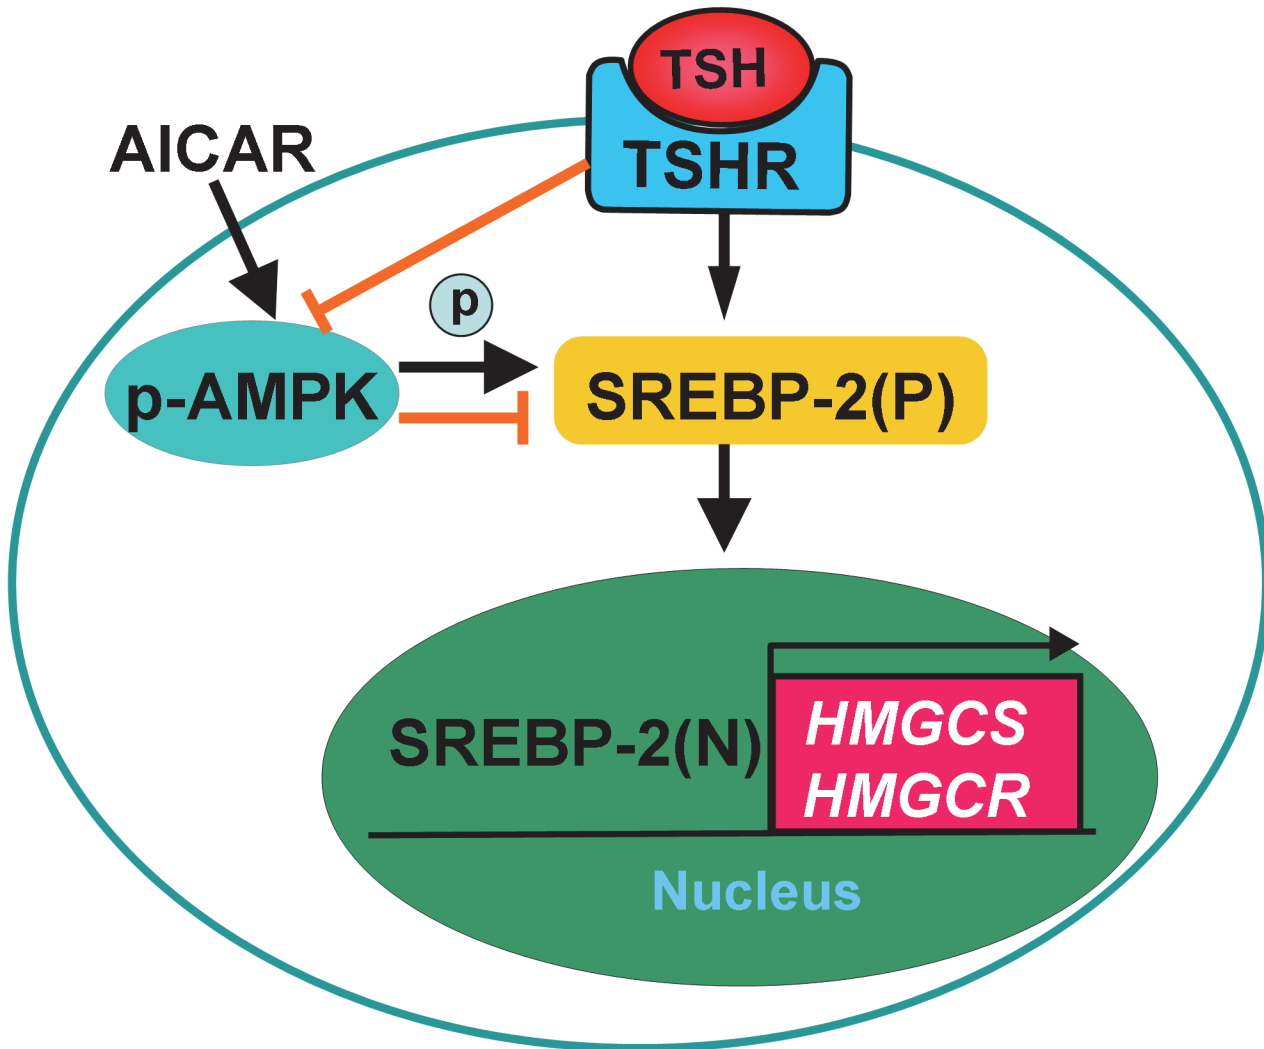

**Fig 7. Proposed regulatory mechanism of SREBP-2 by TSH and AMPK.**

doi:10.1371/journal.pone.0124951.g007

### Author Contributions

Conceived and designed the experiments: SL FJ CY LG YQ JZ. Performed the experiments: SL FJ CY. Analyzed the data: SL FJ LG JZ. Contributed reagents/materials/analysis tools: SL FJ. Wrote the paper: SL FJ.

### References

1. Tian L, Song Y, Xing M, Zhang W, Ning G, Li X, et al. A novel role for thyroid-stimulating hormone: up-regulation of hepatic 3-hydroxy-3-methyl-glutaryl-coenzyme A reductase expression through the cyclic adenosine monophosphate/protein kinase A/cyclic adenosine monophosphate-responsive element binding protein pathway. *Hepatology*. 2010; 52: 1401–1409. doi: [10.1002/hep.23800](https://doi.org/10.1002/hep.23800) PMID: [20648556](https://pubmed.ncbi.nlm.nih.gov/20648556/)
2. Wang T, Xu J, Bo T, Zhou X, Jiang X, Gao L, et al. Decreased fasting blood glucose is associated with impaired hepatic glucose production in thyroid-stimulating hormone receptor knockout mice. *Endocr J*. 2013; 60: 941–950. PMID: [23665701](https://pubmed.ncbi.nlm.nih.gov/23665701/)
3. Karthick N, Dillara K, Poornima KN, Subhasini AS. Dyslipidaemic changes in women with subclinical hypothyroidism. *J Clin Diagn Res*. 2013; 7: 2122–2125. doi: [10.7860/JCDR/2013/5777.3448](https://doi.org/10.7860/JCDR/2013/5777.3448) PMID: [24298454](https://pubmed.ncbi.nlm.nih.gov/24298454/)

4. Asvold BO, Vatten LJ, Nilsen TI, Bjoro T. The association between TSH within the reference range and serum lipid concentrations in a population-based study. The HUNT Study. *Eur J Endocrinol.* 2007; 156: 181–186. PMID: [17287407](#)
5. Garduno-Garcia Jde J, Alvirde-Garcia U, Lopez-Carrasco G, Padilla Mendoza ME, Mehta R, Arellano-Campos O, et al. TSH and free thyroxine concentrations are associated with differing metabolic markers in euthyroid subjects. *Eur J Endocrinol.* 2010; 163: 273–278. doi: [10.1530/EJE-10-0312](#) PMID: [20516204](#)
6. Santos-Palacios S, Brugos-Larumbe A, Guillen-Grima F, Galofre JC. A cross-sectional study of the association between circulating TSH level and lipid profile in a large Spanish population. *Clin Endocrinol (Oxf).* 2013; 79: 874–881. doi: [10.1111/cen.12216](#) PMID: [23550997](#)
7. Peppas M, Betsis G, Dimitriadis G. Lipid abnormalities and cardiometabolic risk in patients with overt and subclinical thyroid disease. *J Lipids.* 2011; 575840.
8. Goldstein JL, DeBose-Boyd RA, Brown MS. Protein sensors for membrane sterols. *Cell.* 2006; 124: 35–46. PMID: [16413480](#)
9. Brown MS, Goldstein JL. The SREBP pathway: regulation of cholesterol metabolism by proteolysis of a membrane-bound transcription factor. *Cell.* 1997; 89: 331–340. PMID: [9150132](#)
10. Horton JD, Shimomura I, Brown MS, Hammer RE, Goldstein JL, Shimano H. Activation of cholesterol synthesis in preference to fatty acid synthesis in liver and adipose tissue of transgenic mice overproducing sterol regulatory element-binding protein-2. *J Clin Invest.* 1998; 101: 2331–2339. PMID: [9616204](#)
11. Min HK, Kapoor A, Fuchs M, Mirshahi F, Zhou H, Maher J, et al. Increased hepatic synthesis and dysregulation of cholesterol metabolism is associated with the severity of nonalcoholic fatty liver disease. *Cell Metab.* 2012; 15: 665–674. doi: [10.1016/j.cmet.2012.04.004](#) PMID: [22560219](#)
12. Chung GE, Kim D, Kim W, Yim JY, Park MJ, Kim YJ, et al. Non-alcoholic fatty liver disease across the spectrum of hypothyroidism. *J Hepatol.* 2012; 57: 150–156. doi: [10.1016/j.jhep.2012.02.027](#) PMID: [22425701](#)
13. Xu L, Ma H, Miao M, Li Y. Impact of subclinical hypothyroidism on the development of non-alcoholic fatty liver disease: a prospective case-control study. *J Hepatol.* 2012; 57: 1153–1154. doi: [10.1016/j.jhep.2012.05.025](#) PMID: [22940010](#)
14. Sert A, Pirgon O, Aypar E, Yilmaz H, Odabas D. Subclinical hypothyroidism as a risk factor for the development of cardiovascular disease in obese adolescents with nonalcoholic fatty liver disease. *Pediatr Cardiol.* 2013; 34: 1166–1174. doi: [10.1007/s00246-013-0638-z](#) PMID: [23344895](#)
15. Hardie DG, Ross FA, Hawley SA. AMPK: a nutrient and energy sensor that maintains energy homeostasis. *Nat Rev Mol Cell Biol.* 2012; 13: 251–262. doi: [10.1038/nrm3311](#) PMID: [22436748](#)
16. Bijland S, Mancini SJ, Salt IP. Role of AMP-activated protein kinase in adipose tissue metabolism and inflammation. *Clin Sci (Lond).* 2013; 124: 491–507. doi: [10.1042/CS20120536](#) PMID: [23298225](#)
17. Hawley SA, Fullerton MD, Ross FA, Schertzer JD, Chevtzoff C, Walker KJ, et al. The ancient drug salicylate directly activates AMP-activated protein kinase. *Science.* 2012; 336: 918–922. doi: [10.1126/science.1215327](#) PMID: [22517326](#)
18. Zhang BB, Zhou G, Li C. AMPK: an emerging drug target for diabetes and the metabolic syndrome. *Cell Metab.* 2009; 9: 407–416. doi: [10.1016/j.cmet.2009.03.012](#) PMID: [19416711](#)
19. Amato S, Liu X, Zheng B, Cantley L, Rakic P, Man HY. AMP-activated protein kinase regulates neuronal polarization by interfering with PI 3-kinase localization. *Science.* 2011; 332: 247–251. doi: [10.1126/science.1201678](#) PMID: [21436401](#)
20. Yang J, Maika S, Craddock L, King JA, Liu ZM. Chronic activation of AMP-activated protein kinase- $\alpha$ 1 in liver leads to decreased adiposity in mice. *Biochem Biophys Res Commun.* 2008; 370: 248–253. doi: [10.1016/j.bbrc.2008.03.094](#) PMID: [18381066](#)
21. Knowles C, Liu ZM, Yang J. Compensatory increase in lipogenic gene expression in adipose tissue of transgenic mice expressing constitutively active AMP-activated protein kinase- $\alpha$ 1 in liver. *Biochem Biophys Res Commun.* 2011; 412: 249–252. doi: [10.1016/j.bbrc.2011.07.078](#) PMID: [21820413](#)
22. Li Y, Xu S, Mihaylova MM, Zheng B, Hou X, Jiang B, et al. AMPK phosphorylates and inhibits SREBP activity to attenuate hepatic steatosis and atherosclerosis in diet-induced insulin-resistant mice. *Cell Metab.* 2011; 13: 376–388. doi: [10.1016/j.cmet.2011.03.009](#) PMID: [21459323](#)
23. Zang M, Xu S, Maitland-Toolan KA, Zuccollo A, Hou X, Jiang B, et al. Polyphenols stimulate AMP-activated protein kinase, lower lipids, and inhibit accelerated atherosclerosis in diabetic LDL receptor-deficient mice. *Diabetes.* 2006; 55: 2180–2191. PMID: [16873680](#)
24. Livak KJ, Schmittgen TD. Analysis of relative gene expression data using real-time quantitative PCR and the 2<sup>-</sup>( $\Delta\Delta$ C<sub>T</sub>) Method. *Methods.* 2001; 25: 402–408. PMID: [11846609](#)

25. Rice LM, Donigan M, Yang M, Liu W, Pandya D, Joseph BK, et al. Protein Phosphatase 2A (PP2A) Regulates Low Density Lipoprotein Uptake through Regulating Sterol Response Element-binding Protein-2 (SREBP-2) DNA Binding. *J Biol Chem*. 2014; 289: 17268–17279. doi: [10.1074/jbc.M114.570390](https://doi.org/10.1074/jbc.M114.570390) PMID: [24770487](https://pubmed.ncbi.nlm.nih.gov/24770487/)
26. Toth JI, Datta S, Athanikar JN, Freedman LP, Osborne TF. Selective coactivator interactions in gene activation by SREBP-1a and -1c. *Mol Cell Biol*. 2004; 24: 8288–8300. PMID: [15340088](https://pubmed.ncbi.nlm.nih.gov/15340088/)
27. Kim SJ, Kim JS, Kim SW, Brantley E, Yun SJ, He J, et al. Macitentan (ACT-064992), a tissue-targeting endothelin receptor antagonist, enhances therapeutic efficacy of paclitaxel by modulating survival pathways in orthotopic models of metastatic human ovarian cancer. *Neoplasia*. 2011; 13: 167–179. PMID: [21403842](https://pubmed.ncbi.nlm.nih.gov/21403842/)
28. Andrade BM, Araujo RL, Perry RL, Souza EC, Cazarin JM, Carvalho DP, et al. A novel role for AMP-kinase in the regulation of the Na<sup>+</sup>/I<sup>-</sup>-symporter and iodide uptake in the rat thyroid gland. *Am J Physiol Cell Physiol*. 2011; 300: C1291–1297. doi: [10.1152/ajpcell.00136.2010](https://doi.org/10.1152/ajpcell.00136.2010) PMID: [21389275](https://pubmed.ncbi.nlm.nih.gov/21389275/)
29. Luboshitzky R, Aviv A, Herer P, Lavie L. Risk factors for cardiovascular disease in women with subclinical hypothyroidism. *Thyroid*. 2002; 12: 421–425. PMID: [12097204](https://pubmed.ncbi.nlm.nih.gov/12097204/)
30. Erem C. Blood coagulation, fibrinolytic activity and lipid profile in subclinical thyroid disease: subclinical hyperthyroidism increases plasma factor X activity. *Clin Endocrinol (Oxf)*. 2006; 64: 323–329. PMID: [16487444](https://pubmed.ncbi.nlm.nih.gov/16487444/)
31. Foretz M, Ancellin N, Andreelli F, Saintillan Y, Grondin P, Kahn A, et al. Short-term overexpression of a constitutively active form of AMP-activated protein kinase in the liver leads to mild hypoglycemia and fatty liver. *Diabetes*. 2005; 54: 1331–1339. PMID: [15855317](https://pubmed.ncbi.nlm.nih.gov/15855317/)
32. Lee S, Lee MS, Kim CT, Kim IH, Kim Y. Ginsenoside Rg3 Reduces Lipid Accumulation with AMP-Activated Protein Kinase (AMPK) Activation in HepG2 Cells. *Int J Mol Sci*. 2012; 13: 5729–5739. doi: [10.3390/ijms13055729](https://doi.org/10.3390/ijms13055729) PMID: [22754327](https://pubmed.ncbi.nlm.nih.gov/22754327/)
33. Kotzka J, Lehr S, Roth G, Avci H, Knebel B, Muller-Wieland D. Insulin-activated Erk-mitogen-activated protein kinases phosphorylate sterol regulatory element-binding Protein-2 at serine residues 432 and 455 in vivo. *J Biol Chem*. 2004; 279: 22404–22411. PMID: [14988395](https://pubmed.ncbi.nlm.nih.gov/14988395/)
34. Walker AK, Yang F, Jiang K, Ji JY, Watts JL, Purushotham A, et al. Conserved role of SIRT1 orthologs in fasting-dependent inhibition of the lipid/cholesterol regulator SREBP. *Genes Dev*. 2010; 24: 1403–1417. doi: [10.1101/gad.1901210](https://doi.org/10.1101/gad.1901210) PMID: [20595232](https://pubmed.ncbi.nlm.nih.gov/20595232/)
35. Arito M, Horiba T, Hachimura S, Inoue J, Sato R. Growth factor-induced phosphorylation of sterol regulatory element-binding proteins inhibits sumoylation, thereby stimulating the expression of their target genes, low density lipoprotein uptake, and lipid synthesis. *J Biol Chem*. 2008; 283: 15224–15231. doi: [10.1074/jbc.M800910200](https://doi.org/10.1074/jbc.M800910200) PMID: [18403372](https://pubmed.ncbi.nlm.nih.gov/18403372/)
36. Sundqvist A, Bengoechea-Alonso MT, Ye X, Lukiyanchuk V, Jin J, Harper JW, et al. Control of lipid metabolism by phosphorylation-dependent degradation of the SREBP family of transcription factors by SCF(Fbw7). *Cell Metab*. 2005; 1: 379–391. PMID: [16054087](https://pubmed.ncbi.nlm.nih.gov/16054087/)
